# Supplementary material for: Association Analysis of Transcriptome and Targeted Metabolites Identifies Key Genes Involved in Iris germanica Anthocyanin Biosynthesis
Source: MDPI journal article supplement (doi:10.3390/ijms242216462), 2023-11-17
Supplement: s1 [file s1]

## Supplementary Material

**Table S1.** The type and content of anthocyanins of standards and falls in different floral development stages

| Code | Compound                                         | Class        | Contents (µg/g) |          |          |          |          |          |
|------|--------------------------------------------------|--------------|-----------------|----------|----------|----------|----------|----------|
|      |                                                  |              | S1              | F1       | S2       | F2       | S3       | F3       |
| 1    | Cyanidin-3-O-glucoside                           | Cyanidin     | 0               | 0        | 0        | 0        | 0        | 0.05265  |
| 2    | Cyanidin-3-O-arabinoside                         | Cyanidin     | 0               | 0        | 0.004057 | 0        | 0        | 0        |
| 3    | Cyanidin-3-O-rutinoside                          | Cyanidin     | 0               | 0        | 0        | 0.01001  | 0.02482  | 0.07361  |
| 4    | Delphinidin-3-O-arabinoside                      | Delphinidin  | 0               | 0        | 0        | 0        | 0        | 0.05649  |
| 5    | Delphinidin-3-O-galactoside                      | Delphinidin  | 10.18           | 8.090    | 8.815    | 7.598    | 1.233    | 0.7445   |
| 6    | Delphinidin-3-O-sophoroside                      | Delphinidin  | 0.02698         | 0.02640  | 0.02880  | 0.5215   | 0.07928  | 1.210    |
| 7    | Delphinidin-3-O-sambubioside                     | Delphinidin  | 0               | 0        | 0        | 0.1017   | 0.03321  | 0.2879   |
| 8    | Delphinidin-3-O-rutinoside                       | Delphinidin  | 0               | 0.3960   | 0.6218   | 12.57    | 22.28    | 34.34    |
| 9    | Delphinidin-3-O-(6-O-acetyl)-glucoside           | Delphinidin  | 0.01836         | 0.02664  | 0.02266  | 0        | 0        | 0        |
| 10   | Delphinidin-3-O-glucoside                        | Delphinidin  | 0               | 0.4787   | 0.3741   | 12.23    | 14.41    | 40.53    |
| 11   | Malvidin-3-O-sophoroside                         | Malvidin     | 0               | 0        | 0.01895  | 0.007346 | 0.04548  | 0.01358  |
| 12   | Malvidin-3,5-O-diglucoside                       | Malvidin     | 0               | 0        | 0        | 0        | 0        | 0.04093  |
| 13   | Malvidin-3-O-(6-O-p-coumaroyl)-glucoside         | Malvidin     | 0.2214          | 0.2721   | 2.454    | 1.095    | 1.802    | 0.6394   |
| 14   | Malvidin-3-O-glucoside                           | Malvidin     | 0.01585         | 0.01934  | 0.03507  | 0.1427   | 0.5973   | 0.8280   |
| 15   | Malvidin-3-O-(6-O-malonyl-beta-D-glucoside)      | Malvidin     | 0.01697         | 0.008949 | 0.04107  | 0.02654  | 0.03276  | 0.02322  |
| 16   | Malvidin-3-O-5-O-(6-O-coumaroyl)-diglucoside     | Malvidin     | 0.006380        | 0.006570 | 0.009163 | 0.005795 | 0.01568  | 0.01032  |
| 17   | Pelargonidin-3-O-5-O-(6-O-coumaroyl)-diglucoside | Pelargonidin | 0.02427         | 0.02457  | 0.02202  | 0.02143  | 0.002452 | 0.003095 |
| Code | Compound                                         | Class        | Contents (µg/g) |          |          |          |          |          |

|    |                                                 |              | S1       | F1       | S2       | F2       | S3       | F3       |
|----|-------------------------------------------------|--------------|----------|----------|----------|----------|----------|----------|
| 18 | Pelargonidin-3-O-(6-O-p-coumaroyl)-glucoside    | Pelargonidin | 2.176    | 1.798    | 2.037    | 1.317    | 0.9911   | 0.6681   |
| 19 | Pelargonidin-3-O-(6-O-malonyl-beta-D-glucoside) | Pelargonidin | 0        | 0        | 0        | 0        | 0.005272 | 0.007691 |
| 20 | Pelargonidin-3-O-galactoside                    | Pelargonidin | 0.1116   | 0.3145   | 0.1402   | 0.3398   | 0        | 0        |
| 21 | Pelargonidin-3,5-O-diglucoside                  | Pelargonidin | 0.005654 | 0.007060 | 0.007995 | 0.01045  | 0        | 0        |
| 22 | Peonidin-3-O-(6-O-p-coumaroyl)-glucoside        | Peonidin     | 0.6282   | 0.4021   | 0.8343   | 0.5465   | 0.8211   | 0.7402   |
| 23 | Peonidin-3-O-5-O-(6-O-coumaroyl)-diglucoside    | Peonidin     | 0.02460  | 0.01620  | 0.01638  | 0.009139 | 0.01184  | 0.009445 |
| 24 | Peonidin-3-O-arabinoside                        | Peonidin     | 0.001255 | 0        | 0.003273 | 0.003289 | 0.002417 | 0.005361 |
| 25 | Peonidin-3-O-rutinoside                         | Peonidin     | 0.01510  | 0.01435  | 0.01766  | 0.01478  | 0.02430  | 0.01836  |
| 26 | Petunidin-3,5-O-diglucoside                     | Petunidin    | 0        | 0        | 0        | 0.004964 | 0.001932 | 0.009862 |
| 27 | Petunidin-3-O-5-O-(6-O-coumaroyl)-diglucoside   | Petunidin    | 0        | 0        | 0.004619 | 0        | 0        | 0        |
| 28 | Petunidin-3-O-arabinoside                       | Petunidin    | 0        | 0        | 0        | 0        | 0.01927  | 0        |
| 29 | Petunidin-3-O-galactoside                       | Petunidin    | 0.1109   | 0.2134   | 0.07786  | 2.188    | 1.623    | 7.594    |
| 30 | Petunidin-3-O-glucoside                         | Petunidin    | 0.02113  | 0.03525  | 0.01529  | 0.4309   | 0.3318   | 1.513    |
| 31 | Procyanidin B3                                  | Procyanidin  | 0        | 0        | 0        | 0        | 0        | 0.02140  |
| 32 | Rutin                                           | flavonoid    | 0.09472  | 0.2689   | 0.3605   | 0.5468   | 0.4853   | 0.7002   |
| 33 | Naringenin-7-O-glucoside                        | flavonoid    | 0.1812   | 0.4543   | 0.2361   | 0.6259   | 0.2260   | 0.3932   |
| 34 | Naringenin                                      | flavonoid    | 0.03245  | 0.03344  | 0.05378  | 0.05256  | 0.02998  | 0.02966  |
| 35 | Dihydromyricetin                                | flavonoid    | 0        | 1.421    | 0.1069   | 2.643    | 0.5721   | 1.519    |
| 36 | Kaempferol-3-O-rutinoside                       | flavonoid    | 0.3230   | 0.7185   | 0.3339   | 0.9943   | 0.2255   | 1.529    |

**Table S2.** The expression levels of candidate genes and transcriptome factors involved in the anthocyanin biosynthetic pathway.

| Gene ID             | Gene name     | Annotation                                                                                                      | Expression level (FPKM <sup>2</sup> ) |        |         |         |         |         |
|---------------------|---------------|-----------------------------------------------------------------------------------------------------------------|---------------------------------------|--------|---------|---------|---------|---------|
|                     |               |                                                                                                                 | S1                                    | S2     | S3      | F1      | F2      | F3      |
| Cluster-7660.64013  | <i>IgPAL1</i> | phenylalanine ammonia lyase, partial ( <i>Tulipa fosteriana</i> )                                               | 209.89                                | 255.24 | 8.24    | 243.18  | 277.53  | 8.61    |
| Cluster-7660.79836  | <i>IgPAL2</i> | phenylalanine ammonia lyase, partial ( <i>Tulipa fosteriana</i> )                                               | 289.64                                | 410.99 | 1881.14 | 391.53  | 523.52  | 2002.57 |
| Cluster-7660.88198  | <i>IgPAL3</i> | phenylalanine ammonia-lyase ( <i>Daucus carota</i> )                                                            | 55.38                                 | 60.09  | 462.90  | 103.95  | 65.52   | 501.70  |
| Cluster-7660.57603  |               | phenylalanine ammonia lyase, partial ( <i>Lilium hybrid division I</i> )                                        | 26.22                                 | 55.97  | 521.60  | 26.99   | 28.74   | 610.67  |
| Cluster-7660.60861  |               | phenylalanine ammonia lyase ( <i>Trifolium pratense</i> )                                                       | 27.50                                 | 32.20  | 165.60  | 44.02   | 41.23   | 177.04  |
| Cluster-7660.61293  |               | phenylalanine ammonia-lyase ( <i>Iris domestica</i> )                                                           | 15.36                                 | 34.84  | 6.32    | 27.60   | 38.88   | 5.20    |
| Cluster-7660.72021  |               | phenylalanine ammonia-lyase 2 ( <i>Narcissus papyraceus</i> )                                                   | 82.01                                 | 135.17 | 17.07   | 114.77  | 155.74  | 20.16   |
| Cluster-7660.76938  |               | phenylalanine ammonia lyase, partial ( <i>Tulipa fosteriana</i> )                                               | 142.63                                | 175.07 | 5.72    | 171.96  | 159.08  | 5.22    |
| Cluster-7660.78047  | <i>IgC4H</i>  | cinnamic acid 4-hydroxylase ( <i>Iris domestica</i> )                                                           | 133.12                                | 180.88 | 39.62   | 190.20  | 225.09  | 35.47   |
| Cluster-7660.78203  |               | cinnamate 4-hydroxylase 2 ( <i>Narcissus papyraceus</i> )                                                       | 709.97                                | 897.45 | 292.17  | 1165.10 | 1530.54 | 365.62  |
| Cluster-7660.124640 |               | putative 4-coumarate--CoA ligase-like protein 8 isoform X2 ( <i>Cinnamomum micranthum</i> f. <i>kanehirae</i> ) | 0.00                                  | 0.58   | 3121.76 | 0.77    | 0.93    | 2603.54 |
| Cluster-7660.117844 |               | 4-coumarate--CoA ligase-like 9 ( <i>Amborella trichopoda</i> )                                                  | 0.88                                  | 2.18   | 306.16  | 1.34    | 1.97    | 273.88  |
| Cluster-7660.74316  |               | 4-coumarate:CoA ligase-like protein ( <i>Albuca bracteata</i> )                                                 | 95.49                                 | 93.35  | 5.00    | 110.13  | 123.31  | 7.90    |
| Cluster-7660.14422  | <i>Ig4CL</i>  | putative 4-coumarate--CoA ligase-like protein 8 isoform X2 ( <i>Cinnamomum micranthum</i> f. <i>kanehirae</i> ) | 0.17                                  | 0.66   | 630.94  | 0.05    | 0.25    | 490.87  |
| Gene ID             | Gene name     | Annotation                                                                                                      | Expression level (FPKM <sup>2</sup> ) |        |         |         |         |         |
|                     |               |                                                                                                                 | S1                                    | S2     | S3      | F1      | F2      | F3      |

|                     |               |                                                                                                          |         |         |         |         |         |         |
|---------------------|---------------|----------------------------------------------------------------------------------------------------------|---------|---------|---------|---------|---------|---------|
| Cluster-7660.124640 |               | putative 4-coumarate--CoA ligase-like protein 8 isoform X2 ( <i>Cinnamomum micranthum f. kanehirae</i> ) | 0.00    | 0.58    | 3121.76 | 0.77    | 0.93    | 2603.54 |
| Cluster-7660.117844 |               | 4-coumarate--CoA ligase-like 9 ( <i>Amborella trichopoda</i> )                                           | 0.88    | 2.18    | 306.16  | 1.34    | 1.97    | 273.88  |
| Cluster-7660.74316  |               | 4-coumarate:CoA ligase-like protein ( <i>Albucca bracteata</i> )                                         | 95.49   | 93.35   | 5.00    | 110.13  | 123.31  | 7.90    |
| Cluster-7660.106434 |               | 4-coumarate--CoA ligase-like 1 ( <i>Elaeis guineensis</i> )                                              | 0.08    | 0.02    | 629.21  | 0.12    | 0.08    | 579.64  |
| Cluster-7660.78753  |               | 4-coumarate--CoA ligase-like 6 ( <i>Phalaenopsis equestris</i> )                                         | 52.80   | 62.05   | 563.57  | 89.62   | 80.42   | 36.76   |
| Cluster-7660.86904  |               | PREDICTED: 4-coumarate--CoA ligase-like 5 isoform X1 ( <i>Nelumbo nucifera</i> )                         | 1.26    | 2.24    | 89.43   | 1.55    | 1.23    | 81.20   |
| Cluster-7660.79841  |               | putative 4-coumarate--CoA ligase-like 8 ( <i>Elaeis guineensis</i> )                                     | 18.05   | 18.62   | 120.16  | 24.38   | 39.10   | 141.63  |
| Cluster-7660.79181  | <i>IgCHS</i>  | chalcone synthase ( <i>Iris hollandica</i> )                                                             | 1401.91 | 1781.38 | 186.72  | 1706.81 | 2014.43 | 347.49  |
| Cluster-7660.83474  |               | chalcone synthase ( <i>Iris hollandica</i> )                                                             | 149.43  | 207.00  | 222.97  | 366.88  | 214.99  | 219.82  |
| Cluster-7660.79235  |               | chalcone synthase ( <i>Iris hollandica</i> )                                                             | 1393.64 | 1949.27 | 436.16  | 1852.25 | 2357.40 | 639.96  |
| Cluster-7660.79134  |               | chalcone synthase ( <i>Hibiscus cannabinus</i> )                                                         | 78.25   | 250.13  | 239.01  | 360.47  | 866.73  | 418.79  |
| Cluster-7660.80852  |               | PREDICTED: chalcone synthase 2-like ( <i>Musa acuminata subsp. malaccensis</i> )                         | 278.18  | 419.34  | 560.07  | 512.66  | 664.39  | 778.47  |
| Cluster-7660.104673 | <i>IgCHI</i>  | ORF124 ( <i>Pinus koraiensis</i> )                                                                       | 18.82   | 22.79   | 11.89   | 88.28   | 55.67   | 33.98   |
| Cluster-7660.77089  |               | chalcone isomerase 2 ( <i>Freesia hybrid cultivar</i> )                                                  | 152.84  | 227.87  | 67.18   | 335.75  | 419.77  | 62.77   |
| Cluster-7660.72712  |               | BnaC09g30110D ( <i>Brassica napus</i> )                                                                  | 92.80   | 95.50   | 20.40   | 502.84  | 141.58  | 107.23  |
| Cluster-7660.121118 |               | chalcone isomerase 1 ( <i>Freesia hybrid cultivar</i> )                                                  | 0.55    | 0.64    | 61.01   | 0.27    | 0.10    | 38.51   |
| Cluster-7660.29211  | <i>IgF3H1</i> | flavanone 3-hydroxylase ( <i>Iris hollandica</i> )                                                       | 0.22    | 1.94    | 10.14   | 27.26   | 142.05  | 9.19    |

| Gene ID            | Gene name     | Annotation                                                                                             | Expression level (FPKM <sup>2</sup> ) |        |       |       |        |       |
|--------------------|---------------|--------------------------------------------------------------------------------------------------------|---------------------------------------|--------|-------|-------|--------|-------|
|                    |               |                                                                                                        | S1                                    | S2     | S3    | F1    | F2     | F3    |
| Cluster-7660.71026 | <i>IgF3H2</i> | PREDICTED: flavonol synthase/flavanone 3-hydroxylase-like ( <i>Musa acuminata subsp. malaccensis</i> ) | 36.96                                 | 123.64 | 1.77  | 45.31 | 252.19 | 3.69  |
| Cluster-7660.73711 |               | flavonol synthase/flavanone 3-hydroxylase-like ( <i>Asparagus officinalis</i> )                        | 11.51                                 | 19.82  | 37.17 | 7.85  | 11.95  | 21.24 |

|                    |                 |                                                                                        |        |        |        |        |        |        |
|--------------------|-----------------|----------------------------------------------------------------------------------------|--------|--------|--------|--------|--------|--------|
| Cluster-7660.78589 |                 | Flavonol synthase/flavanone 3-hydroxylase ( <i>Dendrobium catenatum</i> )              | 10.91  | 20.48  | 0.02   | 9.83   | 21.31  | 0.17   |
| Cluster-7660.80796 |                 | flavonol synthase/flavanone 3-hydroxylase-like ( <i>Asparagus officinalis</i> )        | 22.53  | 32.87  | 6.59   | 21.34  | 28.59  | 3.42   |
| Cluster-7660.77739 | <i>IgF3'5'H</i> | flavonoid 3',5'-hydroxylase 1-like ( <i>Asparagus officinalis</i> )                    | 54.77  | 64.65  | 0.32   | 32.15  | 29.27  | 0.23   |
| Cluster-7660.61786 |                 | Flavonoid 3',5'-hydroxylase ( <i>Actinidia chinensis</i> var. <i>chinensis</i> )       | 13.53  | 35.32  | 180.03 | 25.12  | 81.42  | 129.18 |
| Cluster-7660.95316 |                 | flavonoid 3'-monooxygenase ( <i>Iris hollandica</i> )                                  | 11.78  | 121.84 | 125.25 | 142.76 | 778.38 | 60.01  |
| Cluster-7660.83128 | <i>IgDFR</i>    | dihydroflavonol 4-reductase ( <i>Iris hollandica</i> )                                 | 10.24  | 19.76  | 9.36   | 35.30  | 110.54 | 1.75   |
| Cluster-7660.98534 | <i>IgANS</i>    | anthocyanidin synthase ( <i>Iris hollandica</i> )                                      | 0.63   | 20.67  | 0.84   | 42.26  | 438.21 | 0.81   |
| Cluster-7660.61071 | <i>IgUFGT1</i>  | anthocyanidin 3-O-glucosyltransferase ( <i>Iris hollandica</i> )                       | 7.36   | 66.72  | 0.12   | 142.71 | 533.36 | 0.04   |
| Cluster-7660.60588 | <i>IgUFGT2</i>  | anthocyanin 5-O-glucosyltransferase ( <i>Iris hollandica</i> )                         | 3.78   | 21.48  | 0.83   | 308.27 | 805.16 | 2.35   |
| Cluster-7660.86486 | <i>IgUFGT3</i>  | UDP-glucose-dependent flavonoid glucosyltransferase UGT703B1 ( <i>Crocus sativus</i> ) | 36.27  | 84.61  | 287.21 | 80.53  | 154.97 | 285.64 |
| Cluster-7660.79033 |                 | UDP-glycosyltransferase 88F3-like ( <i>Phoenix dactylifera</i> )                       | 126.00 | 138.61 | 10.98  | 114.01 | 145.05 | 6.73   |
| Cluster-7660.81509 |                 | UDP-glucose-dependent flavonoid glucosyltransferase UGT703B1 ( <i>Crocus sativus</i> ) | 153.64 | 136.20 | 56.34  | 124.15 | 195.44 | 65.64  |

| Gene ID            | Gene name         | Annotation                                                                             | Expression level (FPKM <sup>2</sup> ) |        |        |        |        |        |
|--------------------|-------------------|----------------------------------------------------------------------------------------|---------------------------------------|--------|--------|--------|--------|--------|
|                    |                   |                                                                                        | S1                                    | S2     | S3     | F1     | F2     | F3     |
| Cluster-7660.73000 |                   | UDP-glucose-dependent flavonoid glucosyltransferase UGT703B1 ( <i>Crocus sativus</i> ) | 10.98                                 | 25.55  | 95.94  | 28.27  | 48.90  | 88.84  |
| Cluster-7660.76635 |                   | UDP-glycosyltransferase 88F3 ( <i>Elaeis guineensis</i> )                              | 212.18                                | 193.87 | 3.54   | 159.16 | 155.64 | 0.59   |
| Cluster-7660.57431 |                   | flavonoid glucosyltransferase (plastid) ( <i>Crocus sativus</i> )                      | 3.34                                  | 6.26   | 272.73 | 6.07   | 9.88   | 220.72 |
| Cluster-7660.82663 |                   | Anthocyanin 3'-O-beta-glucosyltransferase ( <i>Dendrobium catenatum</i> )              | 76.97                                 | 75.49  | 395.19 | 77.61  | 88.81  | 328.06 |
| Cluster-7660.60309 |                   | anthocyanin 5-O-glucosyltransferase ( <i>Iris hollandica</i> )                         | 0.61                                  | 3.04   | 0.00   | 63.84  | 90.98  | 0.35   |
| Cluster-7660.59450 | <i>IgAP2/ERF1</i> | AP2/ERF->AP2/ERF-ERF                                                                   | 37.61                                 | 30.22  | 29.68  | 38.78  | 39.03  | 34.07  |

|                     |                   |                      |        |       |        |        |        |        |
|---------------------|-------------------|----------------------|--------|-------|--------|--------|--------|--------|
| Cluster-7660.76315  | <i>IgAP2/ERF2</i> | AP2/ERF->AP2/ERF-ERF | 108.12 | 82.58 | 56.43  | 84.22  | 102.13 | 64.86  |
| Cluster-7660.96364  | <i>IgAP2/ERF3</i> | AP2/ERF->AP2/ERF-ERF | 58.80  | 41.79 | 31.64  | 52.54  | 63.82  | 31.62  |
| Cluster-7660.72002  | <i>IgbHLH1</i>    | bHLH                 | 72.85  | 55.20 | 0.12   | 32.93  | 26.26  | 0.22   |
| Cluster-7660.76887  | <i>IgbHLH2</i>    | bHLH                 | 48.05  | 21.99 | 1.29   | 31.28  | 17.70  | 0.70   |
| Cluster-7660.89024  | <i>IgbHLH3</i>    | bHLH                 | 18.08  | 9.31  | 0.37   | 7.92   | 7.01   | 0.61   |
| Cluster-7660.76117  | <i>IgbZIP1</i>    | bZIP                 | 48.12  | 43.86 | 61.61  | 48.44  | 45.81  | 58.02  |
| Cluster-7660.79673  | <i>IgbZIP2</i>    | bZIP                 | 172.02 | 99.51 | 63.08  | 99.02  | 86.00  | 81.77  |
| Cluster-7660.82667  | <i>IgbZIP3</i>    | bZIP                 | 74.29  | 54.55 | 9.61   | 70.52  | 79.12  | 7.75   |
| Cluster-7660.84758  | <i>IgbZIP4</i>    | bZIP                 | 102.78 | 47.13 | 9.99   | 72.86  | 46.83  | 9.70   |
| Cluster-7660.102699 | <i>IgMYB1</i>     | MYB->MYB             | 31.68  | 24.22 | 155.89 | 41.86  | 33.76  | 161.99 |
| Cluster-7660.66159  | <i>IgMYB2</i>     | MYB->MYB-related     | 46.12  | 23.68 | 0.71   | 22.86  | 27.75  | 0.30   |
| Cluster-7660.73597  | <i>IgMYB3</i>     | MYB->MYB-related     | 28.92  | 23.53 | 0.56   | 40.72  | 25.74  | 0.47   |
| Cluster-7660.74811  | <i>IgMYB4</i>     | MYB->MYB             | 140.66 | 52.30 | 40.74  | 110.76 | 70.83  | 40.14  |
| Cluster-7660.83013  | <i>IgMYB5</i>     | MYB->MYB             | 68.12  | 18.49 | 0.29   | 41.78  | 19.43  | 0.10   |

<sup>z</sup> FPKM: expected number of Fragments Per Kilobase of transcript sequence per Millions base pairs sequenced.

**Table S3.** Primers were used in quantitative real-time PCR was used to verify the expression levels of candidate genes.

| Gene ID            | Primer name | Sequence                  |
|--------------------|-------------|---------------------------|
| Cluster-7660.74312 | IgCHI1_F    | TCTTCGCTTCACCTTTCC        |
|                    | IgCHI1_R    | TGGTCAACACGGATCAAG        |
| Cluster-7660.84403 | IgCHI2_F    | AAGCTGGATTGATGGATGG       |
|                    | IgCHI2_R    | GGTTGGCGTTATTGGAATC       |
| Cluster-7660.29211 | IgF3H_F     | ATCGCAACCTTCCAGAAC        |
|                    | IgF3H_R     | CCTTCTCCGTAACCTTGG        |
| Cluster-7660.95316 | IgF35H_F    | CCTTGATGACGGCTTGTA        |
|                    | IgF35H_R    | GGCTCTCCTACTGAACCT        |
| Cluster-7660.83128 | IgDFR_F     | AAGGAATGGTAGAGGAAGAG      |
|                    | IgDFR_R     | TAGTGTGGTGAAGTTGGTTA      |
| Cluster-7660.98534 | IgANS_F     | GCGTGAGACCTTCCATTG        |
|                    | IgANS_R     | CGGCTTGTGACTGTAGAC        |
| Cluster-7660.57431 | IgGT1_F     | GGAGTAGCCGTGGAAGTA        |
|                    | IgGT1_R     | CGTCGTCTACACCTTCTTC       |
| Cluster-7660.60588 | IgGT2_F     | GCCACCAACGATCTCTAC        |
|                    | IgGT2_R     | CTCCTTCTGCTCCTCCTT        |
| Cluster-7660.80885 | IgGT3_F     | GACCATCATAAGCCAACCT       |
|                    | IgGT3_R     | GAATCTCGCTGCTCTGTT        |
| Reference gene     | IgTublin_F  | TGGTTAGAAAGGAGGCAGAGAATTG |
|                    | IgTublin_R  | CAGTTTCCCATACCAGATCCAGTC  |
